# Supplementary material for: A target responsive aptamer machine for label-free and sensitive non-enzymatic recycling amplification detection of ATP
Source: Royal Society of Chemistry journal article supplement (doi:10.1039/c6cc00110f), 2016-01-01
Supplement: c6cc00110f1.pdf [file c6cc00110f1.pdf]

## Supporting Information

### Target responsive aptamer machine for label-free and sensitive non-enzymatic recycling amplification detection of ATP

Xin Li, Ying Peng, Yaqin Chai, Ruo Yuan and Yun Xiang\*

*Key Laboratory of Luminescent and Real-Time Analytical Chemistry, Ministry of Education, School of Chemistry and Chemical Engineering, Southwest University, Chongqing 400715, P. R. China; Fax: +86-23-68252277; Tel: +86-23-68253172;*

*E-mail: yunatswu@swu.edu.cn (Y. Xiang)*

#### Experimental Section

**Materials:** ATP, cytidine triphosphate (CTP), uridine triphosphate (UTP) and guanosine triphosphate (GTP) were purchased from Worthington Biochemicals (Lakewood, NJ, USA). All oligonucleotides listed in Table S1 were obtained from Shanghai Sangon Biological Engineering Technology and Services (Shanghai, China). NMM was ordered from J&K Scientific Ltd. (Beijing, China). The obtained NMM was diluted to a stock solution of 5 mM with dimethyl sulfoxide (DMSO), stored at -20 °C and freshly diluted to a suitable concentration (50  $\mu$ M) with Tris buffer (20 mM Tris-HCl, 10 mM KCl, 15 mM MgCl<sub>2</sub>, pH 8.0) before usage. Human serums were provided by the 9th People's Hospital of Chongqing (Chongqing, China). Other reagents were purchased from Kelong Chemical Company (Chengdu, China). All the reagents were of analytical grade and used without further purification, and solutions were prepared with ultrapure water (specific resistance of 18.3 M $\Omega$ •cm) during the experimental process.

**Table S1.** The sequences of the oligonucleotides used in the experiments.

| Name                | Sequence                                                    |
|---------------------|-------------------------------------------------------------|
| Aptamer Strand (AS) | 5'-GCCCTACCCAATCTGTGAGAGAACCTGGGGGAGTATTG<br>CGGAGGAAGGT-3' |
| Helper Strand (HS)  | 5'-CCCAGGTTCTC-3'                                           |
| Signal Strand (SS)  | 5'-TCACAGATTGGGTAGGGCGGGTTGGG-3'                            |
| Fuel Strand (FS)    | 5'-AGGTTCTCTCACAGATTGGGTAGGGC-3'                            |

**ATP sensing protocol:** The three-strand DNA partial duplex probes were first prepared by mixing the AS (500 nM), HS (500 nM) and SS (500 nM) in Tris-HCl buffer, and the mixture was heated to 90 °C for 5 min, followed by slowly cooling down to room temperature. Subsequently, the fuel probes were added to the mixture to make the sensing solution. Next, different concentrations of ATP were added to the sensing solution with a reaction volume of 50  $\mu$ L and incubated for 80 min at room temperature. This was followed by the introduction of the NMM (2  $\mu$ M) and further incubation for another 30 min. Finally, the resulting solutions were diluted to 200  $\mu$ L, and fluorescent measurements were performed.

**Fluorescence measurements:** Fluorescent measurements were performed on a RF-5301-PC spectrophotometer (Shimadzu, Tokyo, Japan) utilizing excitation and emission slits of 10 nm and 10 nm, respectively. The fluorescent data were collected from 575 nm to 650 nm by exciting the samples at 399 nm with a 150W Xenon lamp (Ushio Inc, Japan) as the excitation source at room temperature. The fluorescent emission at 610 nm was used as the indicator of the performance of the ATP detection approach.

**Supplementary Figure:**

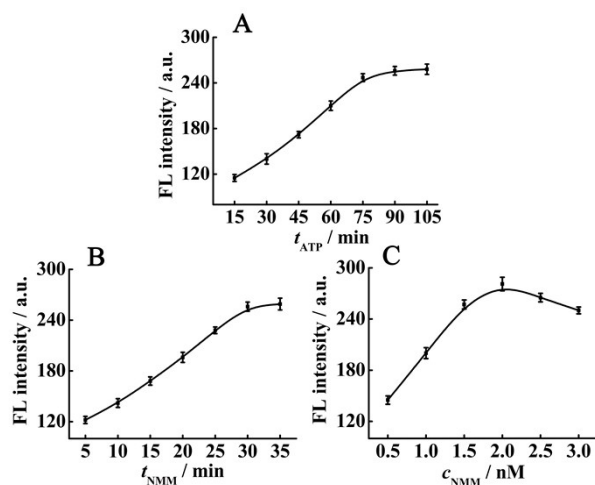

**Fig. S1** Effects of (A) ATP interaction time ( $t_{\text{ATP}}$ ), (B) binding time between NMM and G-quadruplexes ( $t_{\text{NMM}}$ ) and (C) the concentration of NMM ( $c_{\text{NMM}}$ ) on the fluorescent responses of the sensing systems. The concentrations of DNA complex probes, fuel probes, ATP were 500 nM, 500 nM, 500 nM, respectively.

In order to achieve optimal performance of our proposed method for ATP detection, the experimental parameters including the ATP interaction time ( $t_{\text{ATP}}$ ), the binding time between NMM and G-quadruplexes ( $t_{\text{NMM}}$ ) and the concentration of NMM ( $c_{\text{NMM}}$ ) were examined. The fluorescent intensity was evaluated at different experimental conditions and treated as the index of method performance. The effect of  $t_{\text{ATP}}$  on the fluorescence intensity of the sensing solutions with the presence of 500 nM ATP was first investigated from 15 to 105 min with a time interval of 15 min. From Fig. S1A, we can see that evaluated  $t_{\text{ATP}}$  leads to increasing fluorescent response up to 80 min and then levels off after 80 min (with the concentration of NMM at 1.5  $\mu\text{M}$  and the NMM/G-quadruplex binding time of 30 min). Therefore, 80 min of  $t_{\text{ATP}}$  was selected for our assay protocol. According to Fig. S1B, the fluorescence intensity increases with the prolonged  $t_{\text{NMM}}$  in the range of 5 to 30 min and remains almost unchanged thereafter (with the concentration

of NMM at 1.5  $\mu\text{M}$  and interaction time of 80 min). Thus, an optimal  $t_{\text{NMM}}$  of 30 min was used in subsequent experiments. As can be seen from Fig. S1C, the fluorescence intensity presents a peak-shape dependence upon the concentration of NMM (with interaction time of 80 min and the NMM/ G-quadruplex binding time of 30 min) in the range from 0.5 to 3.0  $\mu\text{M}$  and reaches the maximum value at the concentration of 2.0  $\mu\text{M}$ , indicating that 2.0 M of NMM concentration is suitable for the following experiments.

**Table S2.** Different signal amplification approaches for ATP detection.

| Signal amplification                   | Detection method                  | Linear range           | Limit of detection | Ref       |
|----------------------------------------|-----------------------------------|------------------------|--------------------|-----------|
| Exo III-assisted target recycling      | Fluorescence                      | 0.25-500 $\mu\text{M}$ | 0.25 $\mu\text{M}$ | 1         |
| Endonuclease-assisted target recycling | Fluorescence                      | 0.02-100 $\mu\text{M}$ | 20 nM              | 2         |
| Gold nanoparticles (AuNPs)             | Electrochemi luminescence         | 8-2000 nM              | 7.6 nM             | 3         |
| DNAzyme wrapped magnetic nanoparticles | Fluorescence                      | 10-80 nM               | 10 nM              | 4         |
| Nicking enzyme-mediated DNA recycling  | Quartz crystal microbalance assay | 2-10 nM                | 1.3 nM             | 5         |
| Silver nanoparticles                   | Fluorescence                      | 200-200 $\mu\text{M}$  | 48 nM              | 6         |
| DNA-fueled aptamer machine             | Fluorescence                      | 50 -500 nM             | 25 nM              | This work |

References:

- 1 X. Liu, R. Freeman and I. Willner, *Chem. Eur. J.*, 2012, **18**, 2207.
- 2 C. H. Lu, F. Wang and I. Willner, *Chem. Sci.*, 2012, **3**, 2616.
- 3 Y. Liu, J. Lei, Y. Huang and H. Ju, *Anal. Chem.*, 2014, **86**, 8735.
- 4 Y. Guo, G. Yang, X. Sun, H. Y. Chen and J. J. Xu, *Chem. Commun.*, 2015, **51**, 862.
- 5 W. Song, Z. Zhu, Y. Mao and S. Zhang, *Biosens. Bioelectron.*, 2014, **53**, 288.
- 6 Y. Wang, Z. Li, H. Li, M. Vuki, D. Xu and H. Y. Chen, *Biosens. Bioelectron.*, 2012, **32**, 76.
